# Supplementary material for: Artificial hagfish protein fibers with ultra-high and tunable stiffness
Source: Royal Society of Chemistry journal article supplement (doi:10.1039/c7nr02527k), 2017-01-01
Supplement: c7nr02527k1.pdf [file c7nr02527k1.pdf]

## Electronic Supplementary Information

### Artificial Hagfish Protein Fibers with Ultra-High and Tunable Stiffness

Jing Fu,<sup>a</sup> Paul A. Guerette,<sup>a</sup> Andrea Pavesi,<sup>b</sup> Nils Horbelt,<sup>c</sup> Chwee Teck Lim,<sup>d</sup> Matthew J. Harrington<sup>c</sup> and A.Miserez<sup>\*a,e</sup>

<sup>a</sup> School of Materials Science and Engineering, Nanyang Technological University (NTU),  
Singapore 639798

Centre for Biomimetic Sensor Science (CBSS), NTU, Singapore 637553 (Singapore)

Email: ali.miserez@ntu.edu.sg.

<sup>b</sup> Biosystems and Micromechanics (BioSyM), Singapore-MIT Alliance for Research and  
Technology (SMART), Singapore 138602.

<sup>c</sup> Department of Biomaterials, Max Planck Institute of Colloids and Interfaces, Potsdam  
14424, Germany.

<sup>d</sup> Department of Biomedical Engineering, National University of Singapore (NUS), Singapore  
117575.

Mechanobiology Institute, NUS, Singapore 117411.

<sup>e</sup> School of Biological Sciences, NTU, Singapore 637551.

## Supporting Figures

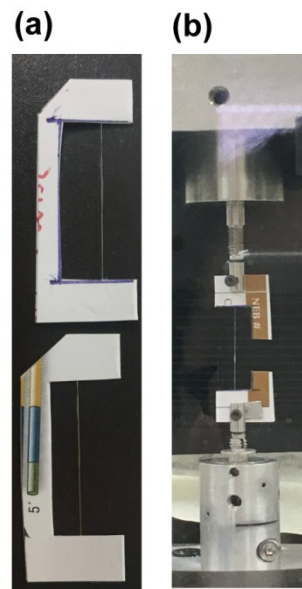

**Fig. S1** Photographs of **(a)** individual fibers fixed on cardboard frames with a gauge length of 20 mm and an average width of 80  $\mu\text{m}$ ; and **(b)** cardboard frame with an individual fiber mounted on the tester grips and side cut open right before testing.

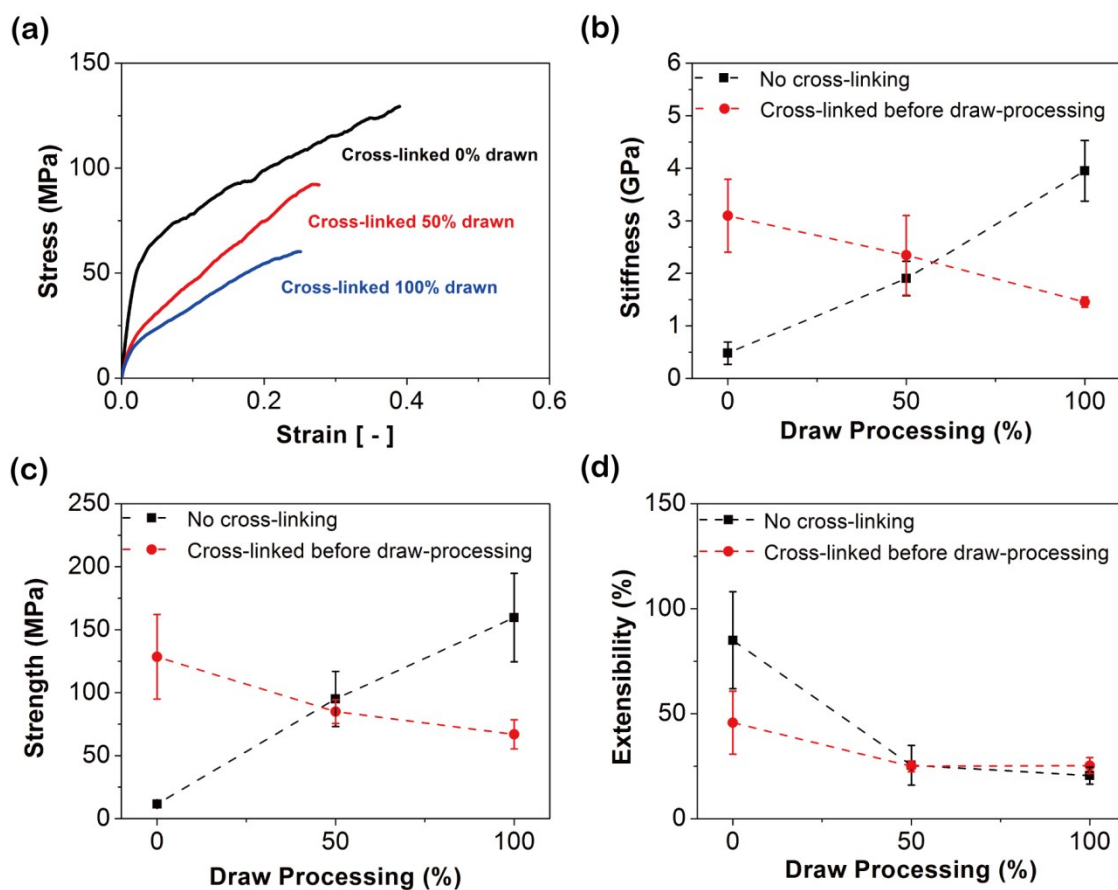

**Fig. S2** Tensile behavior and mechanical properties of artificial (rec)EsTK-based fibers. **(a)** Representative stress-strain curves of fibers cross-linked before draw-processing, strained to failure. All fibers were fully dried. **(b)** Stiffness versus fiber draw-processing degree. **(c)** Strength versus fiber draw-processing degree. **(d)** Extensibility versus fiber draw-processing degree.

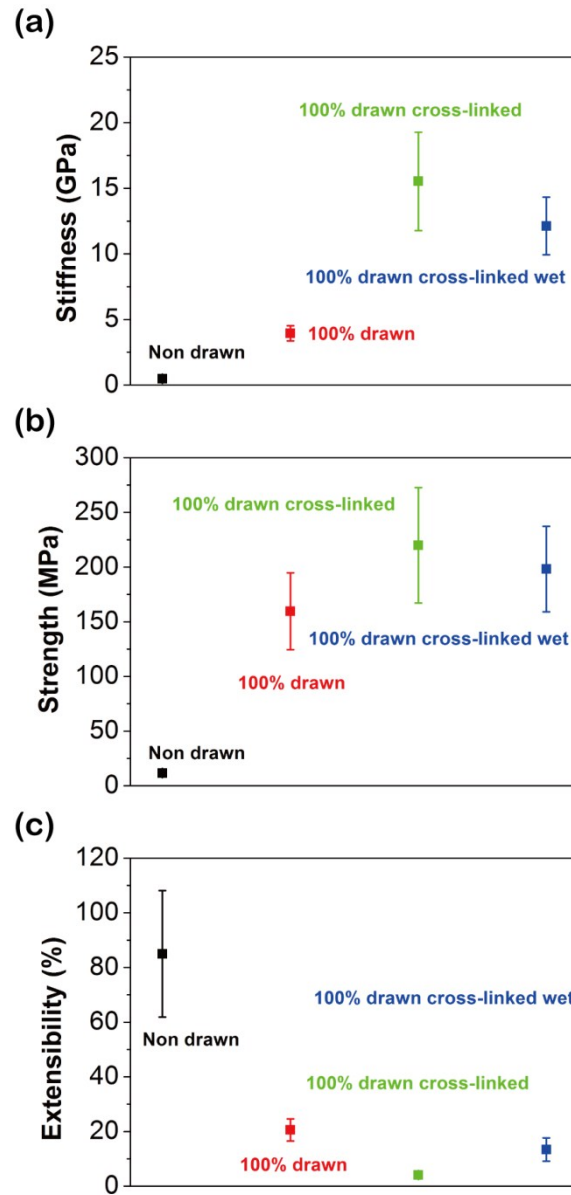

**Fig. S3** Mechanical properties of artificial hagfish fibers of non-drawn, 100% draw-processed, 100% draw-processed cross-linked and re-hydrated 100% draw-processed cross-linked. **(a)** Stiffness; **(b)** Strength; **(c)** Extensibility.
